# Supplementary material
Source: publisher figshare collection journal article supplement (https://karger.figshare.com/ndownloader/files/28409811)
Supplement: Supplementary file 1 [file 28409811]

**S. Table 9. Meta-regression to identify the determinants of different outcomes among COVID-19 positive patients**

| **Outcome** | **Variables** | **Odds ratio (95% CI)** | **p value** |
| --- | --- | --- | --- |
| **AKI** | Geography: (China as ref) | 2.34 (1.50 -3.64) | 0.0002 |
| Study design: (Case series as ref) | 1.80 (1.07 -3.02) | 0.0262 |
| Sample size: (<175 as ref) | 0.62 (0.42 -0.91) | 0.0156 |
| Age: (<60 years as ref) | 3.87 (2.53 -5.91) | <0.001 |
| Criteria: (Not reported as ref) | 0.97 (0.65 -1.45) | 0.8768 |
| Intercept | 0.06 (0.03 -0.13) | <0.001 |
| **KRT** | Geography: (China as ref) | 1.33 (0.53 -3.31) | 0.5458 |
| Study design: (Case series as ref) | 2.82 (0.93 -8.57) | 0.0675 |
| Sample size: (<175 as ref) | 0.67 (0.28 -1.61) | 0.3761 |
| Age: (<60 years as ref) | 2.57 (0.97 -6.8) | 0.0573 |
| Criteria: (Not reported as ref) | 1.01 (0.42 -2.43) | 0.9771 |
| Intercept | 0.02 (0 -0.1) | <0.001 |
| **Mortality** | Geography: (China as ref) | 1.12 (0.38 -3.25) | 0.8416 |
| Study design: (Case series as ref) | 1.01 (0.3 -3.33) | 0.99 |
| Sample size: (<175 as ref) | 1.44 (0.67 -3.13) | 0.3533 |
| Age: (<60 years as ref) | 3.94 (1.55 -9.99) | 0.0039 |
| Criteria: (Not reported as ref) | 0.95 (0.4 -2.29) | 0.9112 |
| Intercept | 0.07 (0.01 -0.36) | 0.0014 |
